# Supplementary material
Source: publisher figshare collection journal article supplement (https://acs.figshare.com/ndownloader/files/4203841)

## Supplemental materials

**Fig. S1.** Surface-enhanced Raman spectrometric analysis. For simplicity, pinocmebrin but not propolis was used in the experiment, where solutions of pinocmebrin (100  $\mu$ M) in PBS with or without 50  $\mu$ M FeSO<sub>4</sub> (pinocmebrin +Fe<sup>2+</sup> or pinocmebrin) were analyzed and H<sub>2</sub>O<sub>2</sub> (20  $\mu$ M) was used as the control. The arrow shows the peak presumably due to H<sub>2</sub>O<sub>2</sub>. Technical service was provided by TopTek-Enwave Optronics Inc., (Nei-Hu, Taipei).

**Fig. S2.** Propolis-Induced oxidative DNA damage is subject to repair. AGS cells in overnight culture at 50% confluency were treated with 0.3  $\mu$ g/ml propolis for 1 h before being analyzed for oxidative DNA damage at the indicated time points (filled circle) Assays without Endo III and Fpg (E+F) were used as control (open circle), indicating that propolis did not cause strand break.

**Fig. S3.** Cellular adaptation to propolis-induced oxidative DNA damage. AGS cells in overnight culture at 50% confluency were treated with or without 0.3  $\mu$ g/ml propolis for 8 h and then treated again with propolis at the same dose for 1 h before being harvested for analysis of oxidative DNA damage with the comet assay (columns 3 and 4). Cells without any treatment or cells received treatment with propolis for 8 h alone, columns 1 and 2, respectively, were used as controls. The asterisk (\*) indicates statistical significance ( $p < 0.01$ ;  $n = 3$ ) between the indicated experiments. Error bars for SE.

**Fig. S4.** Glutathione reductase (GR) activity of cell extracts of CL1-0 cells and the GR RNAi knockdown strain. The knockdown strain was selected from CL1-0 cells transfected with the pLKO.1-shGR vector in puromycin (0.8  $\mu$ g/ml) containing medium. GR activity was measured as described previously (Rescigno et al., *Biochemistry* 1994, 33: 5721-5727). The asterisk (\*) indicates statistical significance ( $p < 0.01$ ;  $n = 3$ ) between the indicated experiments. Error bars for SE.

Fig. S1.

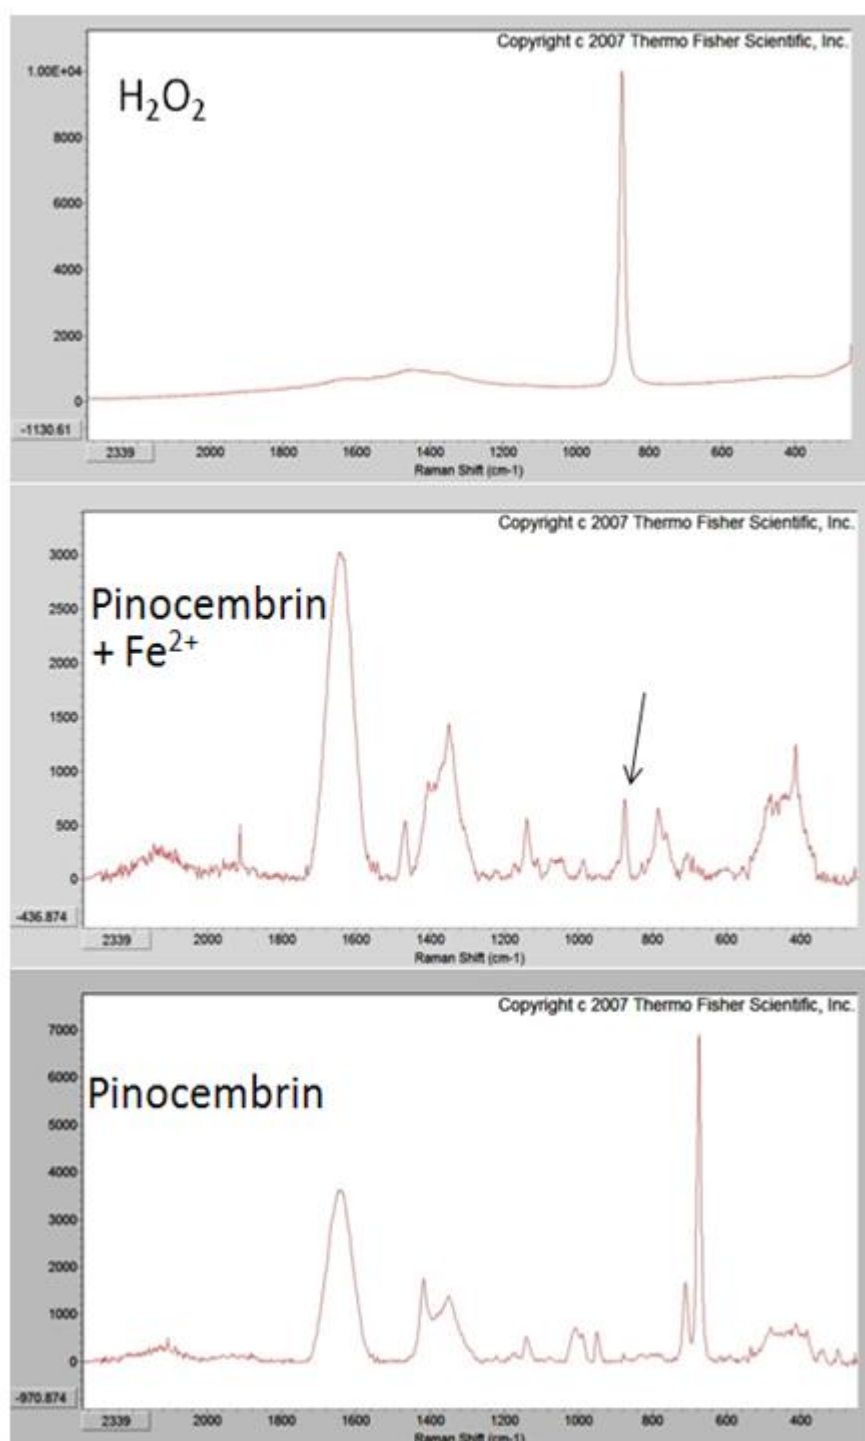

Fig. S2.

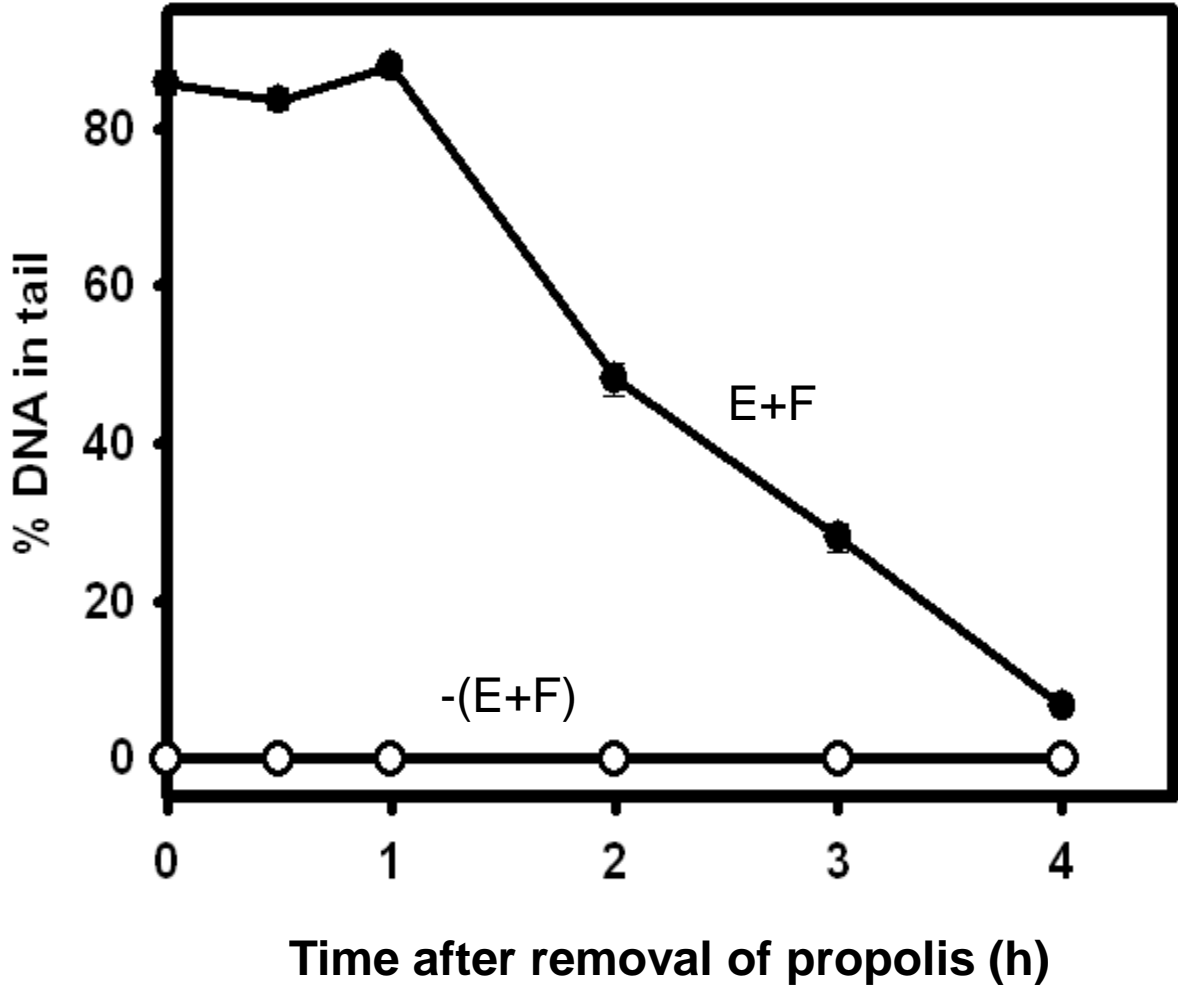

Fig. S3.

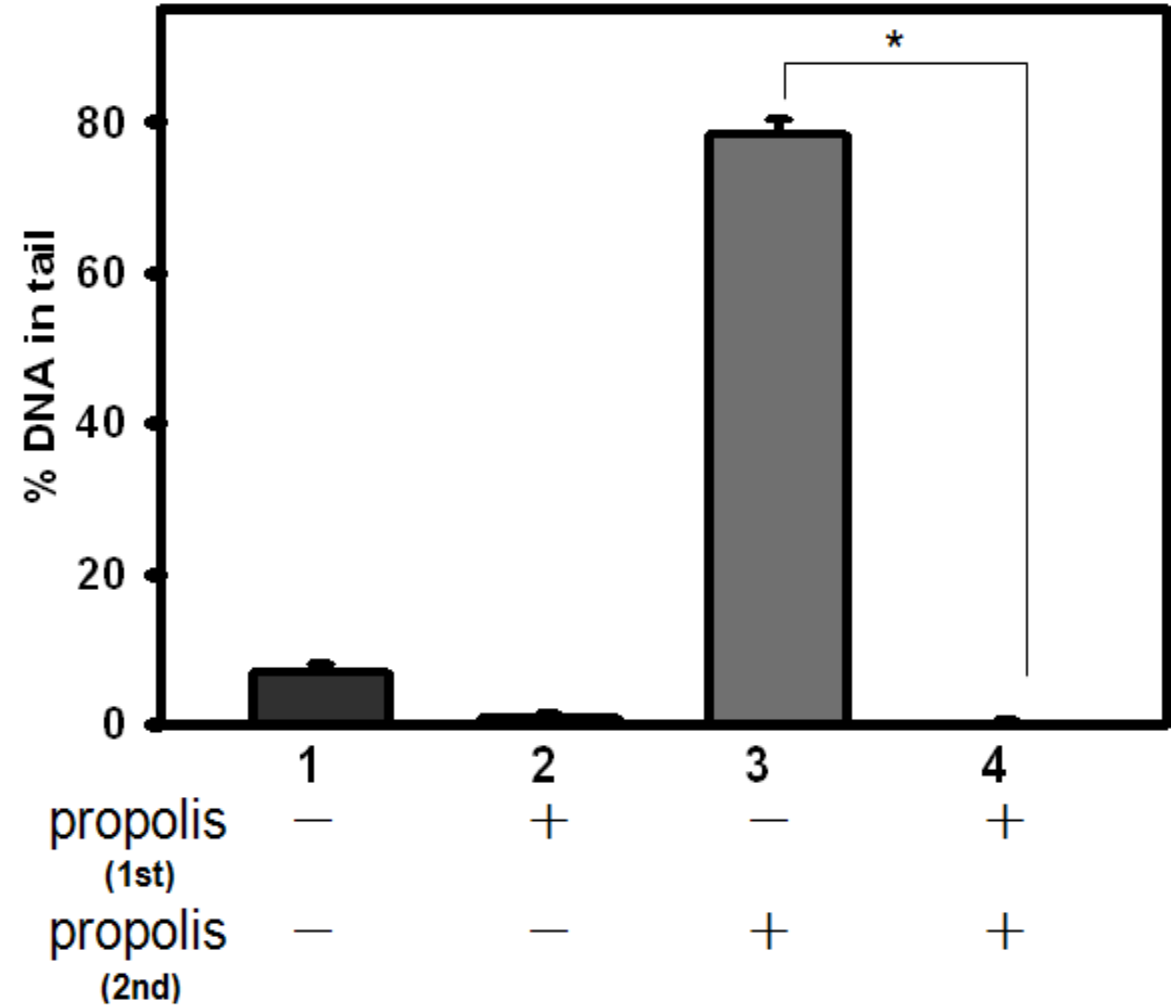

Fig. S4.

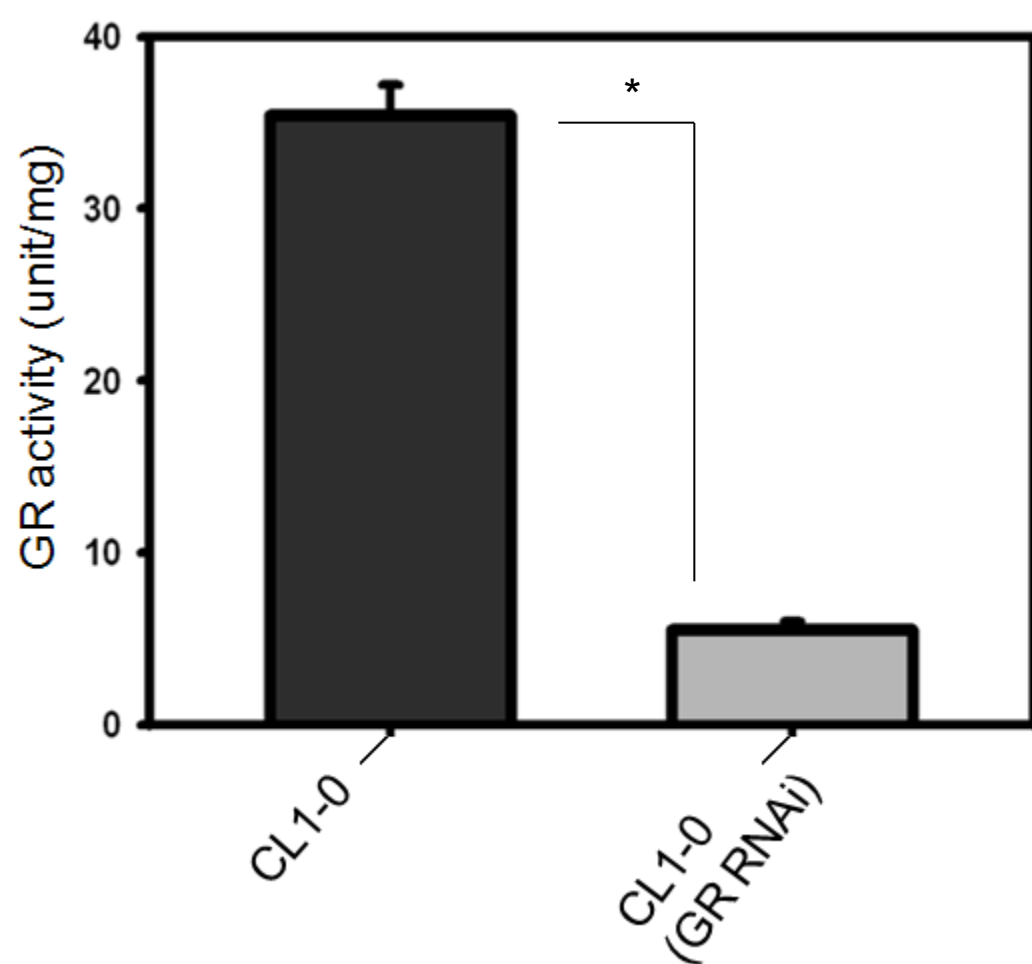

Supplement: Supplementary file 1 [file 4203841]
